# Supplementary material for: Fibroblast-Derived Extracellular Vesicles Induce Colorectal Cancer Progression by Transmitting Amphiregulin
Source: PubMed Central journal article supplement (PMC7381355; doi:10.3389/fcell.2020.00558), 2020-07-07
Supplement: Data_Sheet_1.pdf [file Data_Sheet_1.pdf]

## Fibroblast-derived extracellular vesicles induce colorectal cancer progression by transmitting amphiregulin

| Patient | PTF | CRC-F | Org | Age | Gender | Diagnosis      | TNM     | Grade |
|---------|-----|-------|-----|-----|--------|----------------|---------|-------|
| 1       | -   | +     | +   | 63  | F      | adenocarcinoma | T3N0M0  | 2     |
| 2       | +   | +     | +   | 74  | M      | adenocarcinoma | T3N0M0  | 2     |
| 3       | -   | +     | +   | 75  | M      | adenocarcinoma | T3N2aM0 | 2     |
| 4       | +   | +     | -   | 52  | M      | adenocarcinoma | T3N0M1  | 2     |
| 5       | +   | +     | -   | 73  | F      | adenocarcinoma | T3N0M0  | 2     |
| 6       | +   | +     | -   | 77  | F      | adenocarcinoma | T2N1aM0 | 2     |
| 7       | +   | +     | -   | 76  | M      | adenocarcinoma | T3N1bM0 | 2     |
| 8       | +   | +     | -   | 73  | M      | adenocarcinoma | T3N0M0  | 2     |
| 9       | -   | +     | -   | 45  | F      | adenocarcinoma | T3N2bM0 | 2     |
| 10      | -   | +     | -   | 69  | F      | adenocarcinoma | T2N0M0  | 1     |
| 11      | +   | -     | -   | 42  | M      | adenocarcinoma | T4N2aM0 | 2     |
| 12      | +   | -     | -   | 69  | M      | adenocarcinoma | T4N0M0  | 1     |
| 13      | +   | -     | -   | 49  | M      | adenocarcinoma | T3N2aM0 | 1     |

**Table S1.** Patient data for PTF and CRC-F cultures. Note that CRC organoids #1-3 have been published in our previous studies (Szvicsek et al., 2019).

| Figure No | PTF samples                  | CRC-F samples           | Comment                                           |
|-----------|------------------------------|-------------------------|---------------------------------------------------|
| Fig 6B    | 4, 5, 6, 7, 11               | 4, 5, 6, 7, 10          | 3-4 images/sample evaluated                       |
| Fig 6C    | 6, 7, 11, 12                 | 6, 7, 9, 10             |                                                   |
| Fig 6E    | 4, 5, 6, 7, 11               | 4, 5, 6, 7, 10          | 4-5 images/sample evaluated                       |
| Fig 6F    | 4, 6, 8                      | 4, 6, 8                 |                                                   |
| Fig 6G, H | 4, 5, 6                      | 4, 5, 6                 |                                                   |
| Fig 7A, B | 2, 4, 5, 6, 7, 8, 11, 12, 13 | 2, 4, 5, 6, 7, 8, 9, 10 |                                                   |
| Fig 7C    | 4, 5, 6, 7, 8, 11, 12        | 4, 5, 6, 7, 8           |                                                   |
| Fig 7D    | 4, 5, 6, 7, 8, 11            | 4, 5, 6, 7, 8, 9        | For CRC-F, measurements were repeated three times |
| Fig 8C    | N/A                          | 1, 2, 3                 | Each dot represents one organoid                  |

**Table S2.** Samples used in different experiments.

| Antibody                          | Source           | Clone/Cat No |
|-----------------------------------|------------------|--------------|
| FITC anti-human CD81              | Molecular Probes | A15753       |
| PE anti-human CD63                | Sigma            | SAB4700218   |
| anti-KI67                         | Abcam            | Ab16667      |
| anti-human/mouse active caspase-3 | R&D Systems      | AF835        |

|                           |                          |            |
|---------------------------|--------------------------|------------|
| anti-human $\alpha$ Sma   | Sigma                    | A5228      |
| anti-human AREG           | R&D Systems              | AF262      |
| anti-human CD81           | Sigma                    | SAB3500454 |
| control goat IgG          | R&D Systems              | AB108      |
| anti-mouse IgG Alexa 488  | Invitrogen/Thermo Fisher | AF21202    |
| anti-mouse IgG Alexa 568  | Invitrogen/Thermo Fisher | AF10037    |
| anti-rabbit IgG Alexa 488 | Invitrogen/Thermo Fisher | A21206     |
| anti-rabbit IgG Alexa 568 | Invitrogen/Thermo Fisher | A11011     |
| anti-goat IgG Alexa 488   | Invitrogen/Thermo Fisher | A21467     |
| anti-goat IgG Alexa 568   | Invitrogen/Thermo Fisher | A11057S    |

**Table S3.** Antibodies used in our experiments.

| Primer name | Sequence             | Sequence ID     |
|-------------|----------------------|-----------------|
| hACTA2_fw   | CTGACCCTGAAGTACCCGAT | ENSG00000107796 |
| hACTA2_rev  | GTCATTTTCTCCCGGTTGGC |                 |
| hFAP_fw     | GGAAATGAGCTTCCTCGTCC | ENSG00000078098 |
| hFAP_rev    | GGTGGATCTCCTGGTCTTTG |                 |
| hIL11_fw    | GACAAATTCCCAGCTGACGG | ENSG00000095752 |
| hIL11_rev   | CGCAGGTAGGACAGTAGGT  |                 |
| hIL6_fw     | ATTCCAAAGATGTAGCCGCC | ENSG00000136244 |
| hIL6_rev    | AGTGCCTCTTTGCTGCTTTC |                 |
| hHBEGF_fw   | TTATCCTCCAAGCCACAAGC | ENSG00000113070 |
| hHBEGF_rev  | CCCATGACACCTCTCTCCAT |                 |
| hHPRT1_fw   | TGAGGATTTGGAAAGGGTGT | ENSG00000165704 |
| hHPRT1_rev  | TCCCCTGTTGACTGGTCATT |                 |

**Table S4.** The sequence of primers used for RT-qPCR.

**Table S5.** Ct values detected by TaqMan miRNA array cards from EVs isolated by anti-CD63 and anti-CD81-coated beads. Medium control, untreated and TGF $\beta$ -treated NCF samples were applied (separate Excel sheet).

### Supplementary References

Szvicsek, Z., Oszvald, A., Szabo, L., Sandor, G.O., Kelemen, A., Soos, A.A., et al. (2019). Extracellular vesicle release from intestinal organoids is modulated by Apc mutation and other colorectal cancer progression factors. *Cell Mol Life Sci.* 76, 2463-2476.
